# Supplementary material for: The controlled preparation of cross-linked polyphosphazene nanotubes of high stability via a sacrificial template route
Source: Royal Society of Chemistry journal article supplement (doi:10.1039/b9nj00774a), 2010-01-01
Supplement: b9nj00774a.pdf [file b9nj00774a.pdf]

## Supporting Information

### Controlled preparation of cross-linked polyphosphazene nanotubes with high stability via a sacrificial template route

Jianwei Fu,<sup>\*a</sup> Jiafu Chen,<sup>a</sup> Zhimin Chen,<sup>a</sup> Qun Xu,<sup>\*a</sup> Xiaobin Huang,<sup>b</sup> and Xiaozhen Tang<sup>b</sup>

<sup>a</sup> College of Materials Science and Engineering, Zhengzhou University, 75 Daxue Road, Zhengzhou 450052, China. Fax: +86-371-67767827; Tel: +86-371-67767827.

<sup>b</sup> School of Chemistry and Chemical Technology, Shanghai Jiao Tong University, 800 Dongchuan Road, Shanghai 200240, China.

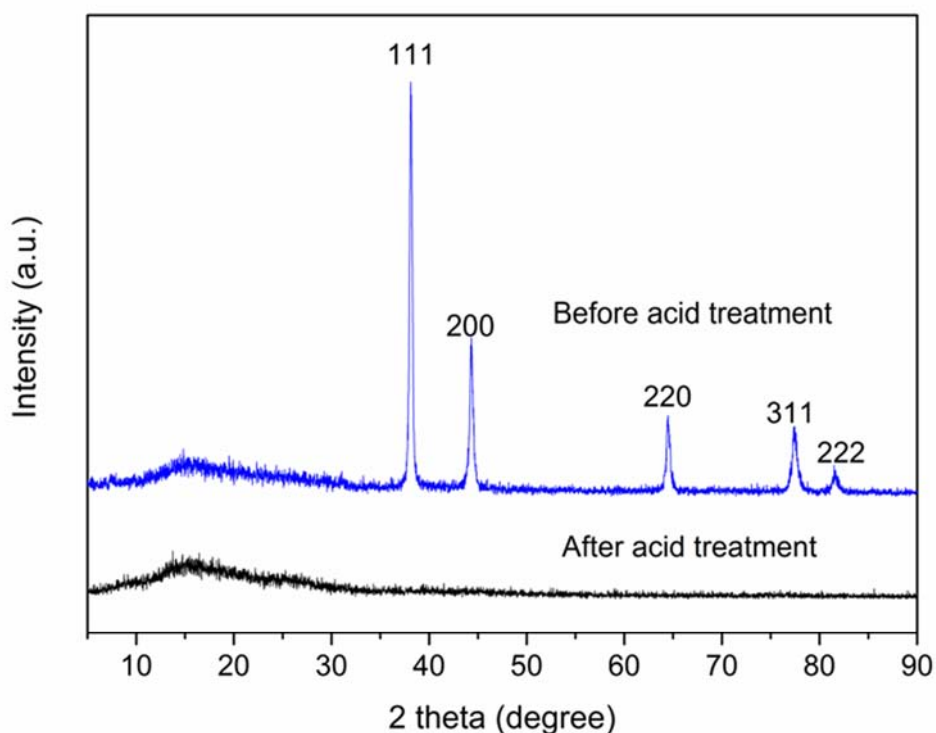

**Fig. S1** XRD spectra of Ag/PZS nanocables before and after 6 h treatment with concentrated nitric acid.

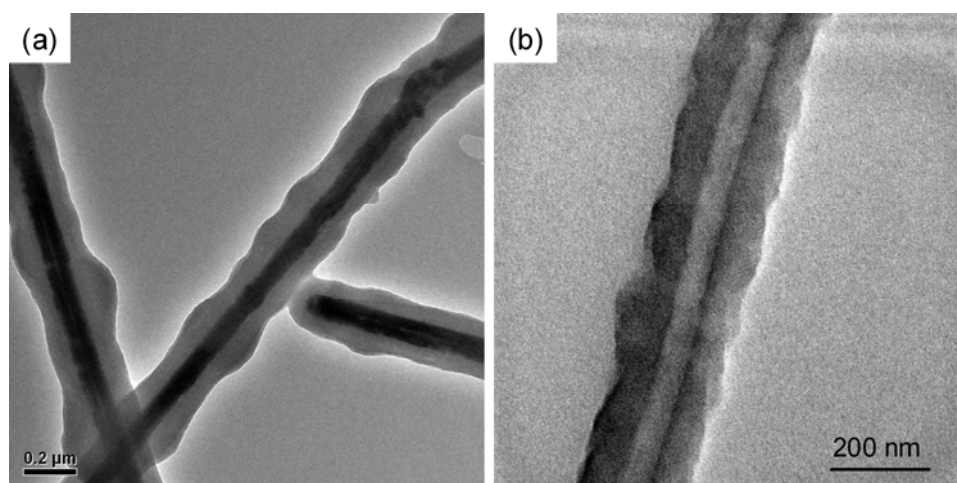

**Fig. S2** TEM images of as-prepared Ag/PZS nanocables (a) and corresponding PZS nanotubes (b) with the wall thickness of about 85 nm. The molar ratio of Ag: HCCP: BPS was 5: 1: 3 during polymerization.
